# Supplementary material for: Fabrication of highly stable and sensitive electrochemical sensor from hemoglobin–Au nanocomposites and its analytical applications
Source: Royal Society of Chemistry journal article supplement (doi:10.1039/c7ra05808j), 2017-01-01
Supplement: c7ra05808j1.pdf [file c7ra05808j1.pdf]

*Supplementary file*

**Hemoglobin-Au nanocomposites fabrication of highly stable  
and sensitive electrochemical sensor and its analytical  
applications**

Weiping Wu<sup>1</sup>, Yuting Fang<sup>1</sup>, Chenchen Zhu, Shiyu Chen, Ting Li, Lei Wu, Ning Bao,  
Yang Liu\* and Haiying Gu\*

Institute of Analytical Chemistry for Life Science, School of Public Health, Nantong  
University, Nantong 226019, China

<sup>1</sup> Both authors contributed equally.

\* Corresponding author: Yang Liu, E-mail address: liuyang1982@ntu.edu.cn;  
Haiying Gu, E-mail address:hygu@ntu.edu.cn

**Figure S1**

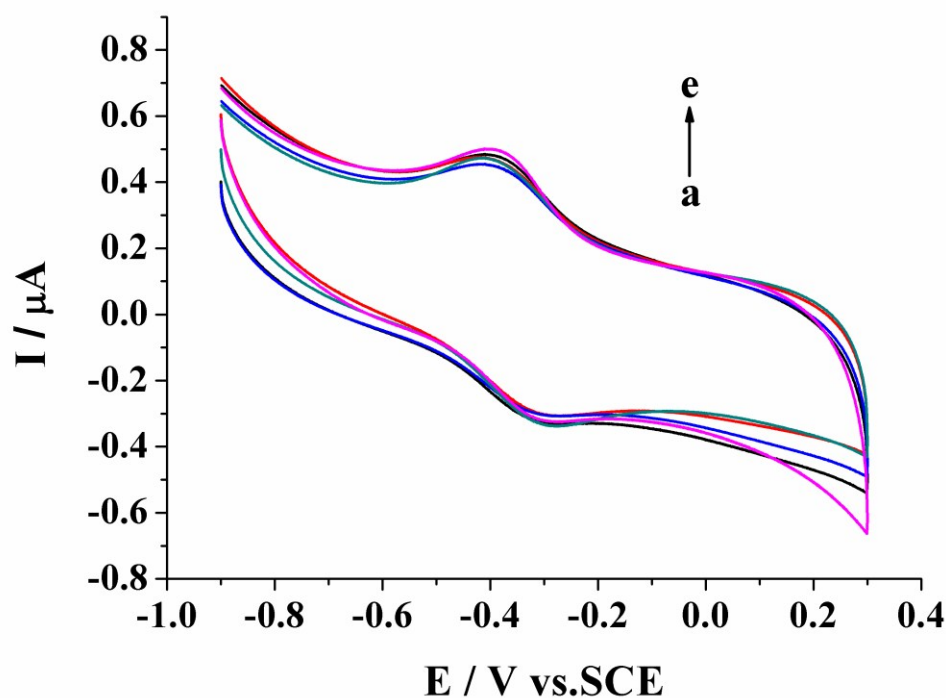

**Figure S1** Cyclic voltammograms (scan potential: from -0.9 to 0.3 V) of different volume ratio of 3.0 mg mL<sup>-1</sup> Hb solution and 0.1 mg mL<sup>-1</sup> Au NPs immobilized on CS-Au NPs modified GCE at 100 mV s<sup>-1</sup> in pH 7.0 PBS (a-e: 1:0.2 , 1:0.25, 1:0.3, 1:0.5, 1:1).

Figure S1 showed the redox peak currents changes with different volume ratios of Hb solution and Au NPs (1:0.2, 1:0.25, 1:0.3, 1:0.5, 1:1) immobilized on CS-Au NPs modified GCE. It could be clearly observed that the redox peak currents increased with the volume ratio changed from 1:0.2 to 1:0.3. However, when the proportion of Au NPs increased further, the redox peak currents tended to be a platform. It was supposed that with the increasement of proportion of Au NPs, more Hb could be combined with Au NPs by electrostatic attraction and chemical bonding (Au-N bond<sup>1</sup>), and reached the saturated state at the volume ratio of 1:0.3. When the proportion of Au NPs increased further, no more Hb could be linked to Au NPs. Therefore, the volume ratio of 1:0.3 was chosen as the optimized condition to be applied in the following experiments.

Figure S2

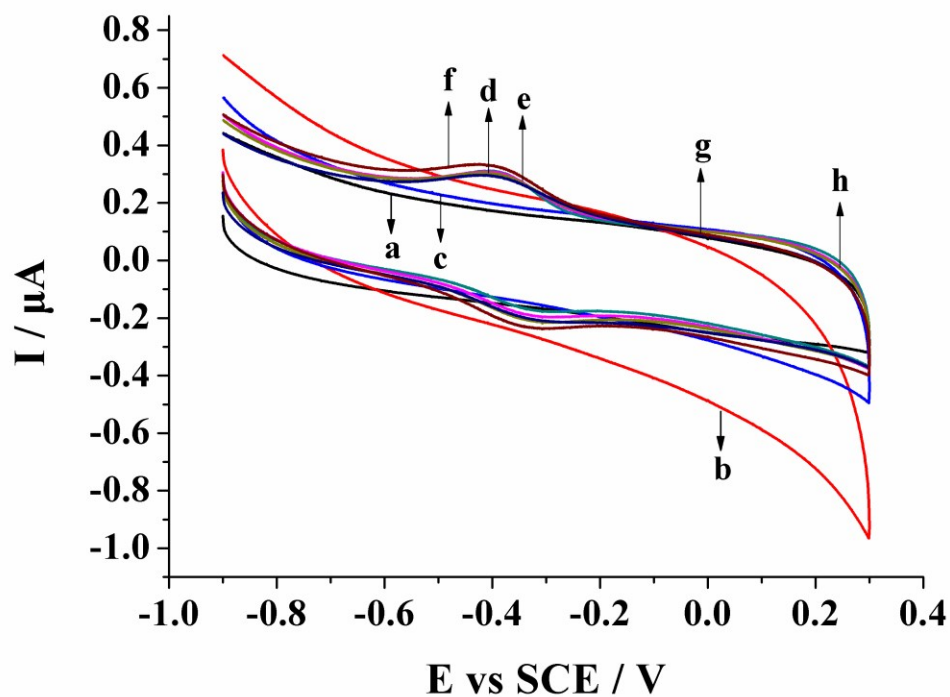

Figure S2 Cyclic voltammograms (scan potential: from -0.9 to 0.3 V) of bare GCE (curve a), CS modified GCE (curve b), CS-Au NPs modified GCE (curve c) and assembly of {Au NPs/Hb-Au NCs}<sub>n</sub> films (n = 1-5) (curve d-h) on the CS modified GCE at 100 mV s<sup>-1</sup> in pH 7.0 PBS

Figure S3

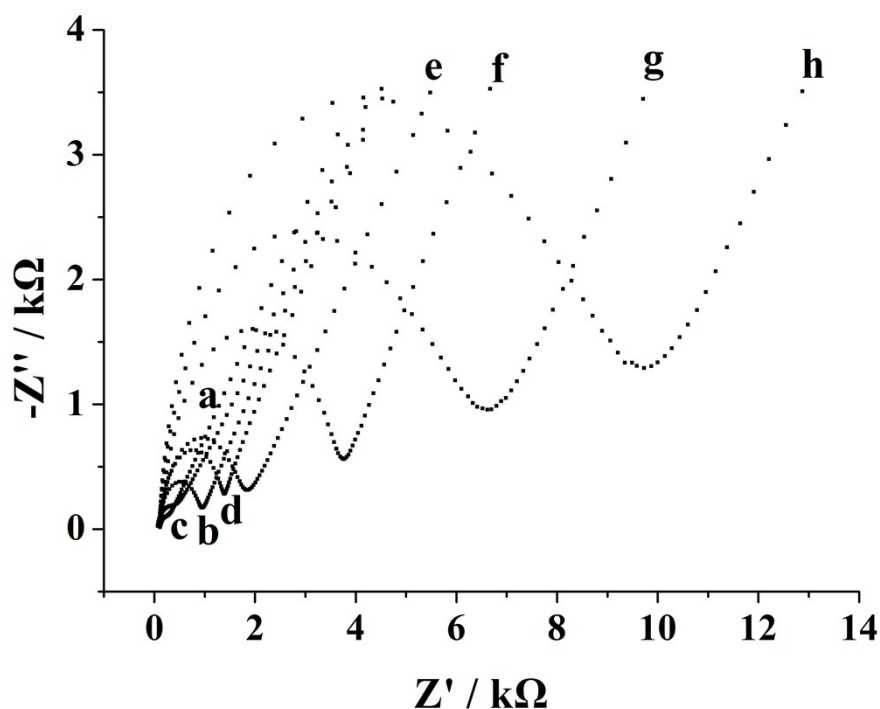

**Figure S3 Electrochemical impedance spectroscopy of bare GCE (curve a), CS modified GCE (curve b), CS-Au NPs modified GCE (curve c) and assembly of {Au NPs/Hb-Au NCs}<sub>n</sub> films (n = 1-5) (curve d-h) on the CS modified GCE in the presence of 5.0 mM [Fe(CN)<sub>6</sub>]<sup>3-</sup>/Fe(CN)<sup>4-</sup> (1:1) containing 0.10 M KCl solution.**

Electrochemical impedance spectroscopy (EIS) was performed in 0.10 M KCl solution including 5 mM Fe(CN)<sub>6</sub><sup>3-</sup>/Fe(CN)<sub>6</sub><sup>4-</sup> (1:1) as a supporting electrolyte at its open circuit potential with the AUTOLAB PGSTAT 302N electrochemical working station (Metrohm Co. Ltd., Switzerland) (begin frequency:  $1.0 \times 10^5$  Hz; end frequency:  $5.0 \times 10^{-2}$  Hz; number of frequency: 60; amplitude of the potential perturbation: 10 mV). A small semicircle was observed at the bare GCE (Fig. S3 curve a). After CS film was electrodeposited on the GCE surface, the size of the semicircle increased (curve b), suggesting that the CS film acted as an insulating layer and barrier, making the interfacial charge transfer inaccessible. When Au NPs was immobilized on the CS-GCE the resistance value decreased (curve c), demonstrating the excellent conductive property of Au NPs<sup>2</sup>. An apparent increase of  $R_{ct}$  could be observed when Hb-Au NCs was immobilized on the Au-CS-GCE (curve d). As Hb can interrupt electron transfer, and Au NPs are able to reduce interfacial resistance, we speculate that the effect of Hb would be predominant. With the assembly of {Au

NPs/Hb-Au NCs<sub>n</sub> layers,  $R_{ct}$  increased with the increase of layer number (curve e-h). Additionally, the  $R_{ct}$  is roughly linearly increased with the layer number, indicating the good LBL assembly process.

**Table S1 EQCM results of {Hb-Au NCs}<sub>n</sub> films**

| 列 1                           | $\Delta F(\times 10^3 \text{ n}=8)$ | m ( $\mu\text{g}$ ) | $\Gamma_{\text{ads}}$<br>( $10^{-9} \text{ mol cm}^{-2}$ ) | $\Gamma_{\text{active}}$<br>( $10^{-9} \text{ mol cm}^{-2}$ ) | $\Gamma_{\text{active}}/\Gamma_{\text{ads}}(\%)$ |
|-------------------------------|-------------------------------------|---------------------|------------------------------------------------------------|---------------------------------------------------------------|--------------------------------------------------|
| Au                            | 0.002±0.0006                        |                     |                                                            |                                                               |                                                  |
| Au-CS                         | 0.202±0.021                         |                     |                                                            |                                                               |                                                  |
| Au-CS-Au                      | 0.299±0.050                         |                     |                                                            |                                                               |                                                  |
| Au-CS-Au-{Au-Hb} <sub>1</sub> | 44.1±3.2                            | 59.13               | 4.67                                                       | 0.6543                                                        | 13.8                                             |
| Au-CS-Au-{Au-Hb} <sub>2</sub> | 89.1±5.2                            | 119.88              | 9.48                                                       | 0.7499                                                        | 7.91                                             |
| Au-CS-Au-{Au-Hb} <sub>3</sub> | 135.1±6.9                           | 181.98              | 14.3                                                       | 0.9338                                                        | 6.53                                             |
| Au-CS-Au-{Au-Hb} <sub>4</sub> | 180.1±4.0                           | 244.08              | 17.73                                                      | 0.935                                                         | 5.27                                             |

**Figure S4**

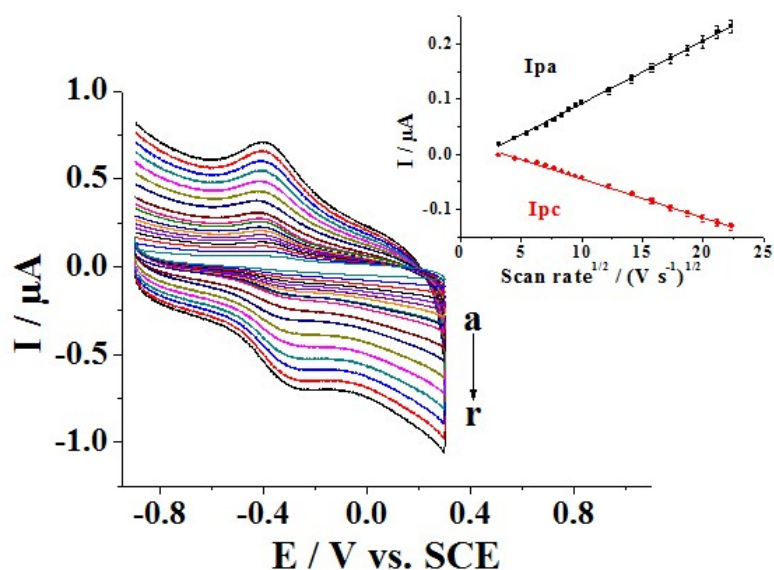

**Figure S4** Cyclic voltammetry (scan potential: from -0.9 to 0.3 V) of GCE-CS-{Au NPs/Hb-Au NCs}<sub>3</sub> in 0.10 M pH 7.0 PBS at 10, 20, 30, 40, 50, 60, 70, 80, 90, 100, 150, 200, 250, 300, 350, 400, 450 and 500 mV s<sup>-1</sup> (a-r). Inset: Plots of the peak currents versus the square root of scan rates.

As depicted in Fig. S4, the redox peak heights of GCE-CS-{Au NPs/Hb-Au NCs}<sub>3</sub> increased with the growing of scan rates, and the peak currents were linearly correlated with the square root of the scan rate ( $v^{1/2}$ ) within the range from 0.01 to 0.5 V s<sup>-1</sup>, suggesting a surface-controlled electrode process. Each Layer of the linear regression equation was  $I_{pc}$  ( $\mu\text{A}$ ) = 0.027 - 0.007  $v^{1/2}$  (V s<sup>-1</sup>) ( $n = 3$ ,  $R^2 = 0.9970$ ), and  $I_{pa}$  ( $\mu\text{A}$ ) = -0.023 + 0.0114 $v^{1/2}$  (V s<sup>-1</sup>) ( $n = 3$ ,  $R^2 = 0.9987$ ). These results indicated that the electrochemical kinetics in both cases were diffusion-control processes<sup>3</sup>. On the other hand, according to Faraday's law<sup>2</sup>:

$$I_{pc} = \frac{n^2 F^2 A \Gamma v}{4RT} = \frac{nFQv}{4RT} \quad (1)$$

Where  $Q$  is the quantity of charge (C). The symbols  $n$ ,  $I_p$ ,  $F$ ,  $R$  and  $T$  have their usual meanings. Calculated from the above-mentioned equation, the electron transfer number ( $n$ ) was  $1.057 \approx 1.0$ , implying a single electron transfer reaction.

Figure S5

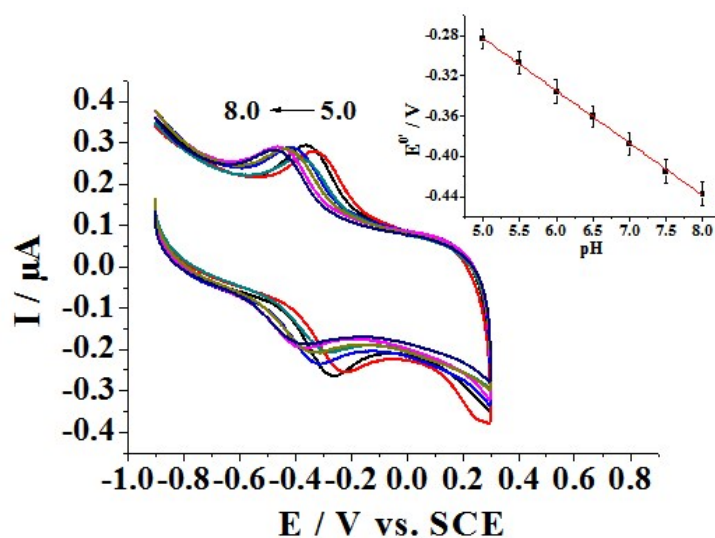

Figure S5 Cyclic voltammograms (scan potential: from -0.9 to 0.3 V) of GCE-CS-{Au NPs/Hb-Au NCs}<sub>3</sub> in 0.10 M pH 7.0 phosphate buffer at different pH values of 5.0, 5.5, 6.0, 6.5, 7.0, 7.5 and 8.0 (from right to left); scan rate: 100 mVs<sup>-1</sup>. Inset: Effect of pH values on the formal potential (E<sup>0</sup>).

It was reported that the pH strongly affects the direct electrochemistry of Hb.<sup>4</sup> From Figure S5, with the the increasement of the pH values, the formal potential (E<sup>0</sup>) of GCE-CS-{Au NPs/Hb-Au NCs}<sub>3</sub> moved to negative values. Within the pH ranges from 5.0 to 8.0, the linear regression equation was  $E^0(\text{V}) = -0.008 - 0.0539 \text{ pH}$ ,  $R^2 = 0.998$ . E<sup>0</sup> decreases linearly with a slope of -53.9 mV per decade pH (inset in Figure S5). This value is extremely close to the theory value of -59.0 mV pH<sup>-1</sup> at 25 °C for reversible proton-coupled electron transfer per decade pH for a reversible proton-coupled single electron transfer <sup>5</sup>.



### **Stability, interference and reproducibility of GCE-CS-{Au NPs/Hb-Au NCs}<sub>3</sub>**

Common species such as Na<sup>+</sup>, K<sup>+</sup>, NH<sub>4</sub><sup>+</sup>, Ca<sup>2+</sup>, Mg<sup>2+</sup>, ascorbic acid, Cl<sup>-</sup>, NO<sub>3</sub><sup>-</sup>, Ac<sup>-</sup>, SCN<sup>-</sup>, H<sub>2</sub>PO<sub>4</sub><sup>-</sup>, HPO<sub>4</sub><sup>2-</sup>, PO<sub>4</sub><sup>3-</sup> and some electroactive species such as dopamine, uric acid, epinephrine and noradrenaline were added to the mixture solution inserted with GCE-CS-{Au NPs/Hb-Au NCs}<sub>3</sub>. The results of experiments showed that these species did not affect the detecting of O<sub>2</sub>, H<sub>2</sub>O<sub>2</sub> and TCA. As all the solutions are deoxygenated during the whole detecting process, the electrocatalysis of H<sub>2</sub>O<sub>2</sub> will be affected when the concentration of TCA is higher than  $3.07 \times 10^{-11}$  M and the electrocatalytic reduction of TCA will be affected when the concentration of H<sub>2</sub>O<sub>2</sub> is higher than  $3.55 \times 10^{-9}$  M. The electrocatalysis of O<sub>2</sub> will be affected when the concentration of TCA is higher than  $3.07 \times 10^{-11}$  M or/and the concentration of H<sub>2</sub>O<sub>2</sub> is higher than  $3.55 \times 10^{-9}$  M. To study the storage stability of the biosensor, we stored it at 4 °C when not in use and measured intermittently. Two weeks later, the response of the modified electrode still retained its activity 92 % of its initial value. The relative standard deviation (RSD) was 2.4 % for 10 independent determinations of  $2.0 \times 10^{-6}$  M H<sub>2</sub>O<sub>2</sub>, which showed excellent reproducibility of the current response for the {Au NPs/Hb-Au NCs}<sub>3</sub> films immobilized on CS modified GCE.

## Reference

- 1 Y. Liu, T. Han, C. Chen, N. Bao, C. M. Yu and H. Y. Gu, *Electrochim. Acta*, 2011, **56**, 3238-3247.
- 2 H. Y. Gu, A. M. Yu and H. Y. Chen, *J. Electroanal. Chem*, 2001, **516**, 119-126.
- 3 Y. Liu, J. Zhou, J. Gong, W. P. Wu, Z. Q. Pan and H. Y. Gu, *Electrochim. Acta*, 2013, **111**, 876-887.
- 4 L. X. Ren, J. P. Dong, X. W. Cheng, J. Q. Xu and P. F. Hu, *Microchim Acta*, 2013, **180**, 1333-1340.
- 5 E. Laviron, *J. Electroanal. Chem*, 1979, **101**, 19-28.
